# Supplementary material for: Sodium-Glucose Cotransporter-2 Inhibitors in Heart Failure with Malnutrition, Frailty, Sarcopenia, or Cachexia
Source: MDPI journal article supplement (doi:10.3390/jcm13061670), 2024-03-14
Supplement: s1 [file s1]

## Supplemental Figure. Propensity-score density before and after the matching

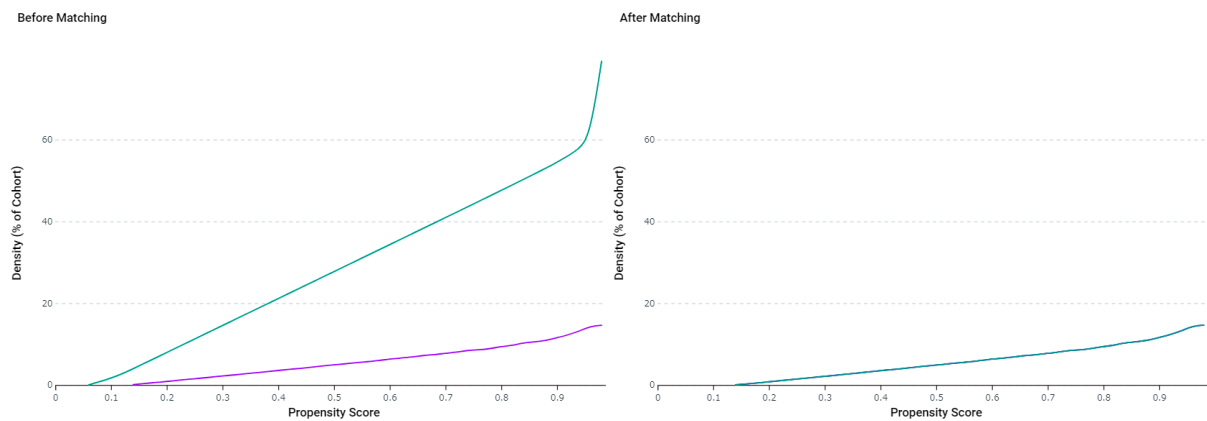

After PSM, 4,697 patients in the SGLT2is group were matched with 4,697 patients in the non-SGLT2is group. Propensity score density showed concordance in the SGLT2is (purple line) and non-SGLT2is (green line) groups.

PSM, propensity score matching; SGLT2is, sodium-glucose transporter 2 inhibitors
