# Supplementary material for: Sodium-Glucose Cotransporter-2 Inhibitors in Heart Failure with Malnutrition, Frailty, Sarcopenia, or Cachexia
Source: MDPI journal article supplement (doi:10.3390/jcm13061670), 2024-03-14
Supplement: s1 [file s1]

| <b>Supplemental Table 1. ICD-10 codes used in the analysis</b> |                                                                                             |
|----------------------------------------------------------------|---------------------------------------------------------------------------------------------|
| D64                                                            | Anemia                                                                                      |
| E08-E13                                                        | Diabetes mellitus                                                                           |
| E40-E46                                                        | Malnutrition                                                                                |
| E66                                                            | Overweight and obesity                                                                      |
| E78                                                            | Disorders of lipoprotein metabolism and other lipidemias                                    |
| F01                                                            | Vascular dementia                                                                           |
| F02                                                            | Dementia in other diseases classified elsewhere                                             |
| F03                                                            | Unspecified dementia                                                                        |
| F04                                                            | Amnestic disorder due to known physiological condition                                      |
| F05                                                            | Delirium due to known physiological condition                                               |
| F06.4                                                          | Anxiety disorder due to known physiological condition                                       |
| F25.1                                                          | Schizoaffective disorder, depressive type                                                   |
| F31                                                            | Bipolar disorder                                                                            |
| F32                                                            | Depressive episode                                                                          |
| F33                                                            | Major depressive disorder, recurrent                                                        |
| F34.1                                                          | Dysthymic disorder                                                                          |
| F41                                                            | Other anxiety disorders                                                                     |
| F43                                                            | Reaction to severe stress, and adjustment disorders                                         |
| F43.2                                                          | Adjustment disorders                                                                        |
| F44                                                            | Dissociative and conversion disorders                                                       |
| G30                                                            | Alzheimer's disease                                                                         |
| G31.0                                                          | Frontotemporal dementia                                                                     |
| G31.1                                                          | Senile degeneration of brain, not elsewhere classified                                      |
| I10-I1A                                                        | Hypertensive diseases                                                                       |
| I20-I25                                                        | Ischemic heart diseases                                                                     |
| I48                                                            | Atrial fibrillation and flutter                                                             |
| I50                                                            | Heart failure                                                                               |
| I63                                                            | Cerebral infarction                                                                         |
| L89                                                            | Pressure ulcer                                                                              |
| M62.84                                                         | Sarcopenia                                                                                  |
| M80                                                            | Osteoporosis with current pathological fracture                                             |
| M81                                                            | Osteoporosis without current pathological fracture                                          |
| M96.6                                                          | Fracture of bone following insertion of orthopedic implant, joint prosthesis, or bone plate |
| N18                                                            | Chronic kidney disease                                                                      |
| R15                                                            | Fecal incontinence                                                                          |
| R26                                                            | Abnormalities of gait and mobility                                                          |
| R29.6                                                          | Repeated falls                                                                              |
| R29.8                                                          | Other symptoms and signs involving the nervous and musculoskeletal systems                  |

|         |                                                                           |
|---------|---------------------------------------------------------------------------|
| R32     | Unspecified urinary incontinence                                          |
| R41     | Other symptoms and signs involving cognitive functions and awareness      |
| R54     | Age-related physical debility (frailty)                                   |
| R55     | Syncope and collapse                                                      |
| R63.4   | Abnormal weight loss                                                      |
| R63.6   | Underweight                                                               |
| R64     | Cachexia                                                                  |
| S32     | Fracture of lumbar spine and pelvis                                       |
| S33     | Dislocation and sprain of joints and ligaments of lumbar spine and pelvis |
| S42     | Fracture of shoulder and upper arm                                        |
| S43     | Dislocation and sprain of joints and ligaments of shoulder girdle         |
| S52     | Fracture of forearm                                                       |
| S53     | Dislocation and sprain of joints and ligaments of elbow                   |
| S62     | Fracture at wrist and hand level                                          |
| S63     | Dislocation and sprain of joints and ligaments at wrist and hand level    |
| S72     | Fracture of femur                                                         |
| S73     | Dislocation and sprain of joint and ligaments of hip                      |
| W00-W19 | Slipping, tripping, stumbling and falls                                   |
| Z72.4   | Inappropriate diet and eating habits                                      |
| Z74     | Problems related to care provider dependency                              |
| Z75     | Problems related to medical facilities and other health care              |

| <b>Supplemental Table 2. Diagnosis in each domain of frailty-related events</b> |                                                                                             |
|---------------------------------------------------------------------------------|---------------------------------------------------------------------------------------------|
| <b>1. Dementia and Delirium</b>                                                 | Vascular dementia                                                                           |
|                                                                                 | Dementia in other diseases classified elsewhere                                             |
|                                                                                 | Unspecified dementia                                                                        |
|                                                                                 | Delirium not induced by alcohol and other psychoactive                                      |
|                                                                                 | Alzheimer's disease                                                                         |
|                                                                                 | Senile degeneration of brain, not elsewhere classified                                      |
|                                                                                 | Circumscribed brain atrophy                                                                 |
|                                                                                 | Organic amnesic syndrome, not induced by alcohol and other psychoactive substances          |
|                                                                                 | Other symptoms and signs involving cognitive functions and awareness                        |
|                                                                                 | Abnormalities of gait and mobility                                                          |
| <b>2. Mobility Problems</b>                                                     | Other and unspecified symptoms and signs involving the nervous and musculoskeletal systems  |
|                                                                                 | Fracture of lumbar spine and pelvis                                                         |
| <b>3. Falls and Fractures</b>                                                   | Dislocation, sprain and strain of joints and ligaments of lumbar spine and pelvis           |
|                                                                                 | Fracture of shoulder and upper arm                                                          |
|                                                                                 | Dislocation, sprain and strain of joints and ligaments of shoulder girdle                   |
|                                                                                 | Fracture of forearm                                                                         |
|                                                                                 | Dislocation, sprain and strain of joints and ligaments of elbow                             |
|                                                                                 | Fracture at wrist and hand level                                                            |
|                                                                                 | Dislocation, sprain and strain of joints and ligaments at wrist and hand level              |
|                                                                                 | Fracture of femur                                                                           |
|                                                                                 | Dislocation, sprain and strain of joint and ligaments of hip                                |
|                                                                                 | Falls                                                                                       |
|                                                                                 | Osteoporosis with pathological fracture                                                     |
|                                                                                 | Osteoporosis without pathological fracture                                                  |
|                                                                                 | Tendency to fall, not elsewhere classified                                                  |
|                                                                                 | Syncope and collapse                                                                        |
|                                                                                 | Fracture of bone following insertion of orthopedic implant, joint prosthesis, or bone plate |
|                                                                                 | Decubitus ulcer and pressure area                                                           |
| <b>4. Pressure Ulcers and Weight Loss</b>                                       | Abnormal weight loss                                                                        |
|                                                                                 | Insufficient intake of food and water due to self-neglect                                   |
|                                                                                 | Inappropriate diet and eating habits                                                        |
|                                                                                 | Unspecified urinary incontinence                                                            |

|                                  |                                                             |
|----------------------------------|-------------------------------------------------------------|
| <b>5. Incontinence</b>           | Fecal incontinence                                          |
|                                  | Problems related to care-provider dependency                |
| <b>6. Dependence and Care</b>    | Problems related to medical facilities and other healthcare |
| <b>7. Anxiety and Depression</b> | Other anxiety disorders                                     |
|                                  | Reaction to severe stress, and adjustment disorders         |
|                                  | Dissociative [conversion] disorders                         |
|                                  | Organic anxiety disorder                                    |
|                                  | Depressive episode                                          |
|                                  | Recurrent depressive disorder                               |
|                                  | Schizoaffective disorder, depressive type                   |
|                                  | Bipolar affective disorder                                  |
|                                  | Dysthymia                                                   |
|                                  | Adjustment disorders                                        |

| <b>Supplemental Table 3. Incidence of frailty-related events</b> |                                                                                            |                                 |                                     |
|------------------------------------------------------------------|--------------------------------------------------------------------------------------------|---------------------------------|-------------------------------------|
|                                                                  |                                                                                            | SGLT2is<br>group<br>(n = 4,697) | Non-SGLT2is<br>group<br>(n = 4,697) |
| <b>1. Dementia<br/>and Delirium</b>                              | Vascular dementia                                                                          | 62 (1.3%)                       | 95 (2%)                             |
|                                                                  | Dementia in other diseases classified elsewhere                                            | 70 (1.5%)                       | 116 (2.5%)                          |
|                                                                  | Unspecified dementia                                                                       | 178 (3.8%)                      | 273 (5.8%)                          |
|                                                                  | Delirium not induced by alcohol and other psychoactive                                     | 125 (2.7%)                      | 220 (4.7%)                          |
|                                                                  | Alzheimer's disease                                                                        | 52 (1.1%)                       | 67 (1.4%)                           |
|                                                                  | Senile degeneration of brain, not elsewhere classified                                     | 10 (0.2%)                       | 10 (0.2%)                           |
|                                                                  | Circumscribed brain atrophy                                                                | 10 (0.2%)                       | 10 (0.2%)                           |
|                                                                  | Organic amnesic syndrome, not induced by alcohol and other psychoactive substances         | 10 (0.2%)                       | 10 (0.2%)                           |
|                                                                  | Other symptoms and signs involving cognitive functions and awareness                       | 735 (15.6%)                     | 1101 (23.4%)                        |
| <b>2. Mobility<br/>Problems</b>                                  | Abnormalities of gait and mobility                                                         | 520 (11.1%)                     | 514 (10.9%)                         |
|                                                                  | Other and unspecified symptoms and signs involving the nervous and musculoskeletal systems | 326 (6.9%)                      | 380 (8.1%)                          |
|                                                                  | Fracture of lumbar spine and pelvis                                                        | 92 (2%)                         | 117 (2.5%)                          |
| <b>3. Falls and<br/>Fractures</b>                                | Dislocation, sprain and strain of joints and ligaments of lumbar spine and pelvis          | 10 (0.2%)                       | 10 (0.2%)                           |
|                                                                  | Fracture of shoulder and upper arm                                                         | 44 (0.9%)                       | 62 (1.3%)                           |
|                                                                  | Dislocation, sprain and strain of joints and ligaments of shoulder girdle                  | 24 (0.5%)                       | 15 (0.3%)                           |
|                                                                  | Fracture of forearm                                                                        | 22 (0.5%)                       | 21 (0.4%)                           |

|                                           |                                                                                             |            |              |
|-------------------------------------------|---------------------------------------------------------------------------------------------|------------|--------------|
|                                           | Dislocation, sprain and strain of joints and ligaments of elbow                             | 10 (0.2%)  | 0 (0%)       |
|                                           | Fracture at wrist and hand level                                                            | 25 (0.5%)  | 25 (0.5%)    |
|                                           | Dislocation, sprain and strain of joints and ligaments at wrist and hand level              | 14 (0.3%)  | 10 (0.2%)    |
|                                           | Fracture of femur                                                                           | 85 (1.8%)  | 107 (2.3%)   |
|                                           | Dislocation, sprain and strain of joint and ligaments of hip                                | 10 (0.2%)  | 10 (0.2%)    |
|                                           | Falls                                                                                       | 414 (8.8%) | 450 (9.6%)   |
|                                           | Osteoporosis with pathological fracture                                                     | 53 (1.1%)  | 55 (1.2%)    |
|                                           | Osteoporosis without pathological fracture                                                  | 332 (7.1%) | 299 (6.4%)   |
|                                           | Tendency to fall, not elsewhere classified                                                  | 218 (4.6%) | 222 (4.7%)   |
|                                           | Syncope and collapse                                                                        | 394 (8.4%) | 369 (7.9%)   |
|                                           | Fracture of bone following insertion of orthopedic implant, joint prosthesis, or bone plate | 0 (0%)     | 10 (0.2%)    |
|                                           | Decubitus ulcer and pressure area                                                           | 323 (6.9%) | 582 (12.4%)  |
| <b>4. Pressure Ulcers and Weight Loss</b> | Abnormal weight loss                                                                        | 220 (4.7%) | 222 (4.7%)   |
|                                           | Insufficient intake of food and water due to self-neglect                                   | 11 (0.2%)  | 15 (0.3%)    |
|                                           | Inappropriate diet and eating habits                                                        | 10 (0.2%)  | 10 (0.2%)    |
|                                           | Unspecified urinary incontinence                                                            | 177 (3.8%) | 218 (4.6%)   |
| <b>5. Incontinence</b>                    | Faecal incontinence                                                                         | 70 (1.5%)  | 77 (1.6%)    |
|                                           | Problems related to care-provider dependency                                                | 427 (9.1%) | 497 (10.6%)  |
| <b>6. Dependence and Care</b>             | Problems related to medical facilities and other healthcare                                 | 20 (0.4%)  | 28 (0.6%)    |
| <b>7. Anxiety and Depression</b>          | Other anxiety disorders                                                                     | 988 (21%)  | 1011 (21.5%) |

|  |                                                     |              |            |
|--|-----------------------------------------------------|--------------|------------|
|  | Reaction to severe stress, and adjustment disorders | 273 (5.8%)   | 286 (6.1%) |
|  | Dissociative [conversion] disorders                 | 15 (0.3%)    | 20 (0.4%)  |
|  | Organic anxiety disorder                            | 25 (0.5%)    | 28 (0.6%)  |
|  | Depressive episode                                  | 1075 (22.9%) | 1129 (24%) |
|  | Recurrent depressive disorder                       | 298 (6.3%)   | 253 (5.4%) |
|  | Schizoaffective disorder, depressive type           | 10 (0.2%)    | 10 (0.2%)  |
|  | Bipolar affective disorder                          | 100 (2.1%)   | 101 (2.2%) |
|  | Dysthymia                                           | 41 (0.9%)    | 46 (1%)    |
|  | Adjustment disorders                                | 174 (3.7%)   | 199 (4.2%) |
